# Supplementary material for: PNPLA3 rs738409 Genetic Variant Inversely Correlates with Platelet Count, Thereby Affecting the Performance of Noninvasive Scores of Hepatic Fibrosis
Source: MDPI journal article supplement (doi:10.3390/ijms242015046), 2023-10-10

## Supplementary

**Table S1.** Demographic, anthropometric and clinical features of the Liver Biopsy cohort (LBC,  $n = 1155$ ).

|                                         | <b>LBC<br/>(<math>n = 1155</math>)</b> |
|-----------------------------------------|----------------------------------------|
| Sex, M/F                                | 546/609                                |
| Age, years                              | $48.1 \pm 12.8$                        |
| BMI, kg/m <sup>2</sup>                  | $35.2 \pm 8.6$                         |
| IFG/T2D (0/1)                           | 878/277                                |
| Total cholesterol, mmol/L               | $5.1 \pm 1.07$                         |
| LDL cholesterol, mmol/L                 | $3.1 \pm 0.97$                         |
| HDL cholesterol, mmol/L                 | $1.3 \pm 0.37$                         |
| Triglycerides, mmol/L                   | $1.59 \{0.98-1.91\}$                   |
| ALT, IU/l                               | 32 {20–55}                             |
| AST, IU/l                               | 24 {18–36}                             |
| GGT, IU/l                               | 38 {21–78}                             |
| Steatosis $\geq 2$ , yes (%)            | 560 (48)                               |
| Lobular inflammation $\geq 1$ , yes (%) | 749 (64)                               |
| Ballooning $\geq 1$ , yes (%)           | 333 (29)                               |
| Fibrosis $\geq 2$ , yes (%)             | 255 (22)                               |
| PLT count $\times 10^3$                 | $246 \pm 71$                           |
| FIB-4                                   | $1.22 \pm 1.55$                        |
| APRI                                    | $0.32 \pm 0.42$                        |
| Forns' index                            | $4.46 \pm 2.08$                        |
| <i>PNPLA3</i> rs738409, p.I148M         |                                        |
| CC, yes (%)                             | 484 (41.9)                             |
| CG, yes (%)                             | 485 (42)                               |
| GG, yes (%)                             | 186 (16.1)                             |

Values are reported as mean  $\pm$  SD, number (%) or median {IQR}, as appropriate. BMI: body mass index; IFG: impaired fasting; T2D: type 2 diabetes mellitus.

**Table S2.** Association of the *PNPLA3* rs738409 C>G variant with hematological parameters and liver-related outcomes and in the UK Biobank cohort (UKBBC).

| Phenotype                                                              | Estimate ( $\beta$ ) | p-Value                |
|------------------------------------------------------------------------|----------------------|------------------------|
| K70: Alcoholic liver disease                                           | 0.0009               | $1.71 \times 10^{-14}$ |
| K74: Fibrosis and cirrhosis of liver                                   | 0.0009               | $2.32 \times 10^{-11}$ |
| K75: Other inflammatory liver diseases                                 | 0.0006               | $2.06 \times 10^{-08}$ |
| K76: Other diseases of liver                                           | 0.002                | $2.51 \times 10^{-22}$ |
| K70-K77: Diseases of liver                                             | 0.003                | $3.38 \times 10^{-25}$ |
| I85 Oesophageal varices                                                | 0.0007               | $3.03 \times 10^{-14}$ |
| Platelet count                                                         | -1.54                | $2.9 \times 10^{-45}$  |
| Haemoglobin concentration                                              | 0.02                 | $9.09 \times 10^{-35}$ |
| Platelet crit                                                          | -0.001               | $3.62 \times 10^{-29}$ |
| Haematocrit percentage                                                 | 0.06                 | $2.94 \times 10^{-25}$ |
| Mean corpuscular haemoglobin                                           | 0.03                 | $2.28 \times 10^{-19}$ |
| Mean platelet (thrombocyte) volume                                     | 0.01                 | $9.53 \times 10^{-18}$ |
| Mean corpuscular volume                                                | 0.07                 | $9.44 \times 10^{-16}$ |
| Monocyte percentage                                                    | 0.04                 | $4.70 \times 10^{-15}$ |
| Mean spheroid cell volume                                              | 0.07                 | $1.15 \times 10^{-10}$ |
| Red blood cell (erythrocyte) distribution width                        | -0.011               | $5.84 \times 10^{-08}$ |
| Neutrophil count                                                       | -0.016               | $7.00 \times 10^{-08}$ |
| White blood cell (leukocyte) count                                     | -0.019               | $3.69 \times 10^{-07}$ |
| Red blood cell (erythrocyte) count                                     | 0.003                | $1.97 \times 10^{-06}$ |
| D65-D69 Coagulation defects, purpura and other haemorrhagic conditions | 0.0005               | 0.018                  |
| D69 Purpura and other haemorrhagic conditions                          | 0.0003               | 0.04                   |

Biochemical parameters were assessed in the entire cohort (n = 500,000 subjects). HWE: 0.06; MAF: 0.22. Reference allele: G.

**Table S3:** Demographic, anthropometric and clinical features of 167 severely obese patients of whom RNAseq data were available.

|                                   | <b>Transcriptomic<br/>cohort<br/>(<i>n</i> = 167)</b> |
|-----------------------------------|-------------------------------------------------------|
| Sex, M/F                          | 28/139                                                |
| Age, years                        | 43±10                                                 |
| BMI, kg/m <sup>2</sup>            | 41.3±7.4                                              |
| IFG/T2D (0/1)                     | 150/17                                                |
| Total cholesterol, mmol/L         | 5.3±1.2                                               |
| LDL cholesterol, mmol/L           | 3.3±0.9                                               |
| HDL cholesterol, mmol/L           | 1.4±0.35                                              |
| Triglycerides, mmol/L             | 1.45±0.7                                              |
| ALT, IU/l                         | 16 {20-30}                                            |
| AST, IU/l                         | 15 {18-24}                                            |
| GGT, IU/l                         | 15 {24-43}                                            |
| Steatosis ≥ 2, yes (%)            | 82 (49)                                               |
| Lobular inflammation ≥ 1, yes (%) | 94 (56)                                               |
| Ballooning ≥ 1, yes (%)           | 24 (14)                                               |
| Fibrosis ≥ 2, yes (%)             | 13 (8)                                                |
| PLT count                         | 274 ± 67                                              |
| FIB-4                             | 0.74 ± 0.48                                           |
| APRI                              | 0.20 ± 0.28                                           |
| Forns' index                      | 3.22 ± 1.47                                           |
| <i>PNPLA3</i> rs738409, p.I148M   |                                                       |
| CC, yes (%)                       | 78 (47)                                               |
| CG, yes (%)                       | 74 (44)                                               |
| GG, yes (%)                       | 15 (9)                                                |

Values are reported as mean ± SD, number (%) or median {IQR}, as appropriate. BMI: body mass index; IFG: impaired fasting; T2D: type 2 diabetes mellitus.

**Table S4.** Correlation analyses of gene expression of PNPLA3 and genes involved in PLT biosynthesis and clearance in  $n = 167$  patients belonging to the Transcriptomic cohort.

| mRNA   | PNPLA3 expression    |                |
|--------|----------------------|----------------|
|        | Estimate ( $\beta$ ) | <i>p-Value</i> |
| DIAPH1 | 1.24                 | <0.0001        |
| ETV6   | 0.09                 | <0.0001        |
| IKZF5  | 0.16                 | <0.0001        |
| MYH9   | 2.50                 | <0.0001        |
| ORAI1  | 0.07                 | <0.0001        |
| STIM1  | 0.40                 | <0.0001        |

## Supplementary References

1. Dongiovanni, P., et al., *Transmembrane 6 superfamily member 2 gene variant disentangles nonalcoholic steatohepatitis from cardiovascular disease*. Hepatology, 2015. **61**(2): p. 506-14.
2. Meroni, M. and M. Longo, *The rs599839 A>G Variant Disentangles Cardiovascular Risk and Hepatocellular Carcinoma in NAFLD Patients*. 2021. **13**(8).
3. Meroni, M., et al., *Low Lipoprotein(a) Levels Predict Hepatic Fibrosis in Patients With Nonalcoholic Fatty Liver Disease*. 2022. **6**(3): p. 535-549.

## Supplementary Figure Legends

**Figure S1: Impact of the *PNPLA3* rs2294918 protective variant genotype on platelet count.** Platelets distribution in 1155 MASLD patients, stratified according to the presence of the *PNPLA3* rs2294918 (p.E434K, G>A) variant ( $n=549$  GG (48%);  $n=417$  GA (36%) and  $n=189$  AA (16%)). The estimates ( $\beta$ ) were obtained from ordinal logistic regression analysis adjusted for gender, age, body mass index (BMI), type 2 diabetes (T2D) by using an additive (Model 1 <sup>°</sup>) or recessive model (Model 2 <sup>†</sup>) (A).

**Figure S2: Impact of the *PNPLA3* genotype on non-invasive tests in predicting fibrosis stage.** ROC curves describe the accuracy of the non-invasive scores, AST to Platelet Ratio Index (APRI) (A) and Forns' index (B) in discriminating the histological stage of fibrosis in 1155 MASLD patients stratified according to the presence of *PNPLA3* homozygosity ( $n=969$  CC/CG and  $n=186$  GG). Area under the curves (AUC) are reported in the graphs.

### Figure S1

A

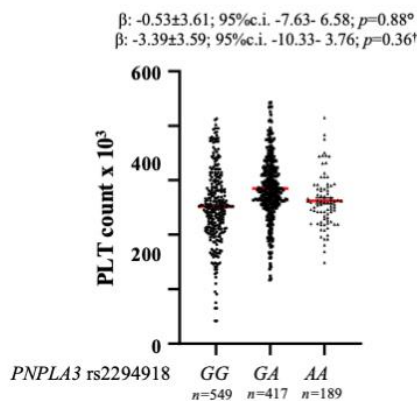

**Figure S2**

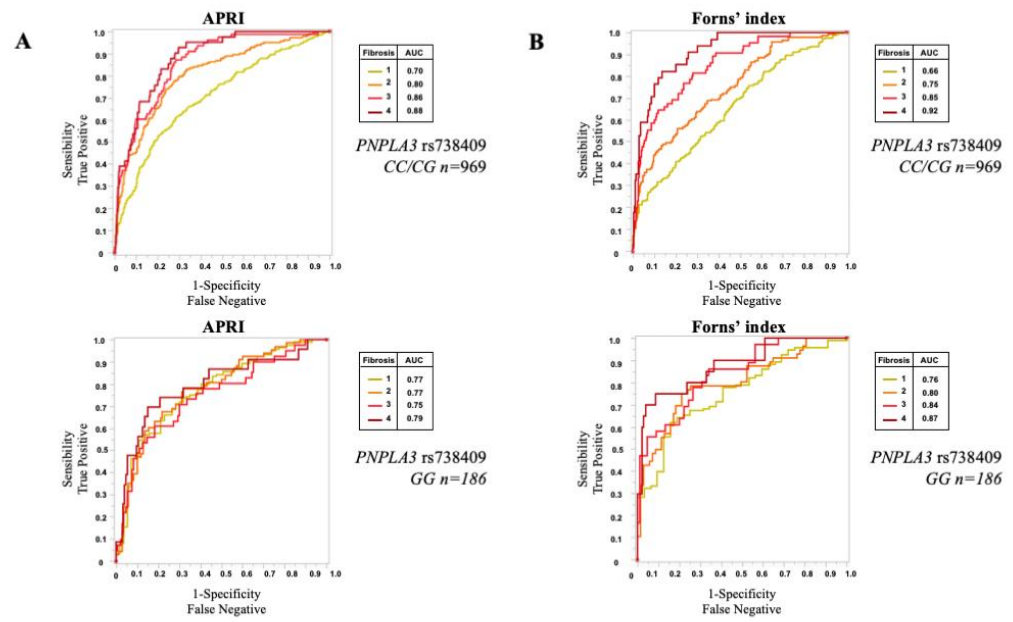

Supplement: s1 [file s1]
